# Supplementary material
Source: PubMed Central journal article supplement (PMC3203630)
Supplement: supp_gfr448_Supplementary_Figure_1.pdf [file supp_gfr448_Supplementary_Figure_1.pdf]

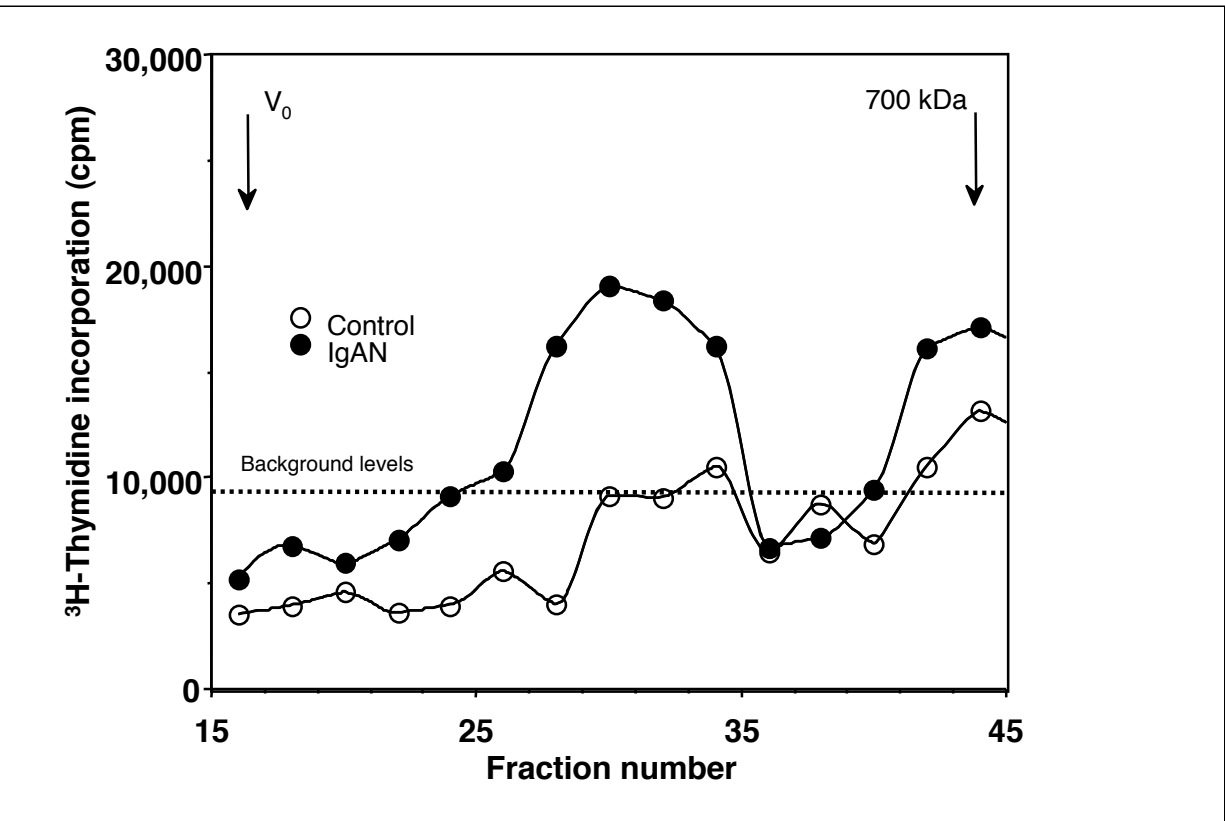

Supplementary Figure 1. Proliferation of MC stimulated with CIC from an IgAN patient (full circles) and the corresponding fractions from a healthy control (empty circles). Only the IgAN patient had stimulatory CIC. When IgA1 was depleted, the stimulatory complexes were removed, indicating that the stimulatory CIC contained IgA1.
